# Supplementary material
Source: ML conference proceedings conference paper supplement (https://openreview.net/forum?id=DaDHiSZ8bp)

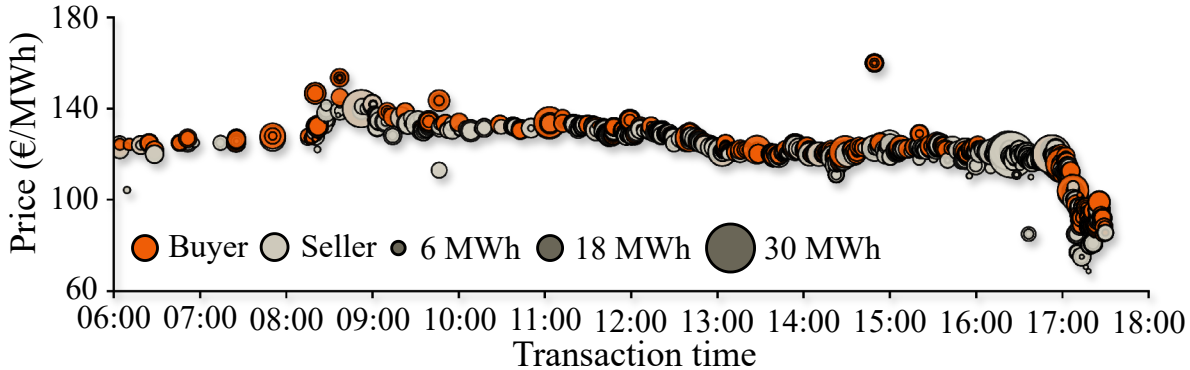

Supplement: supplementary_material [file Buy_Sell_Interaction.pdf › ICLR_OrderFusion/Figure/Buy_Sell_Interaction.pdf]

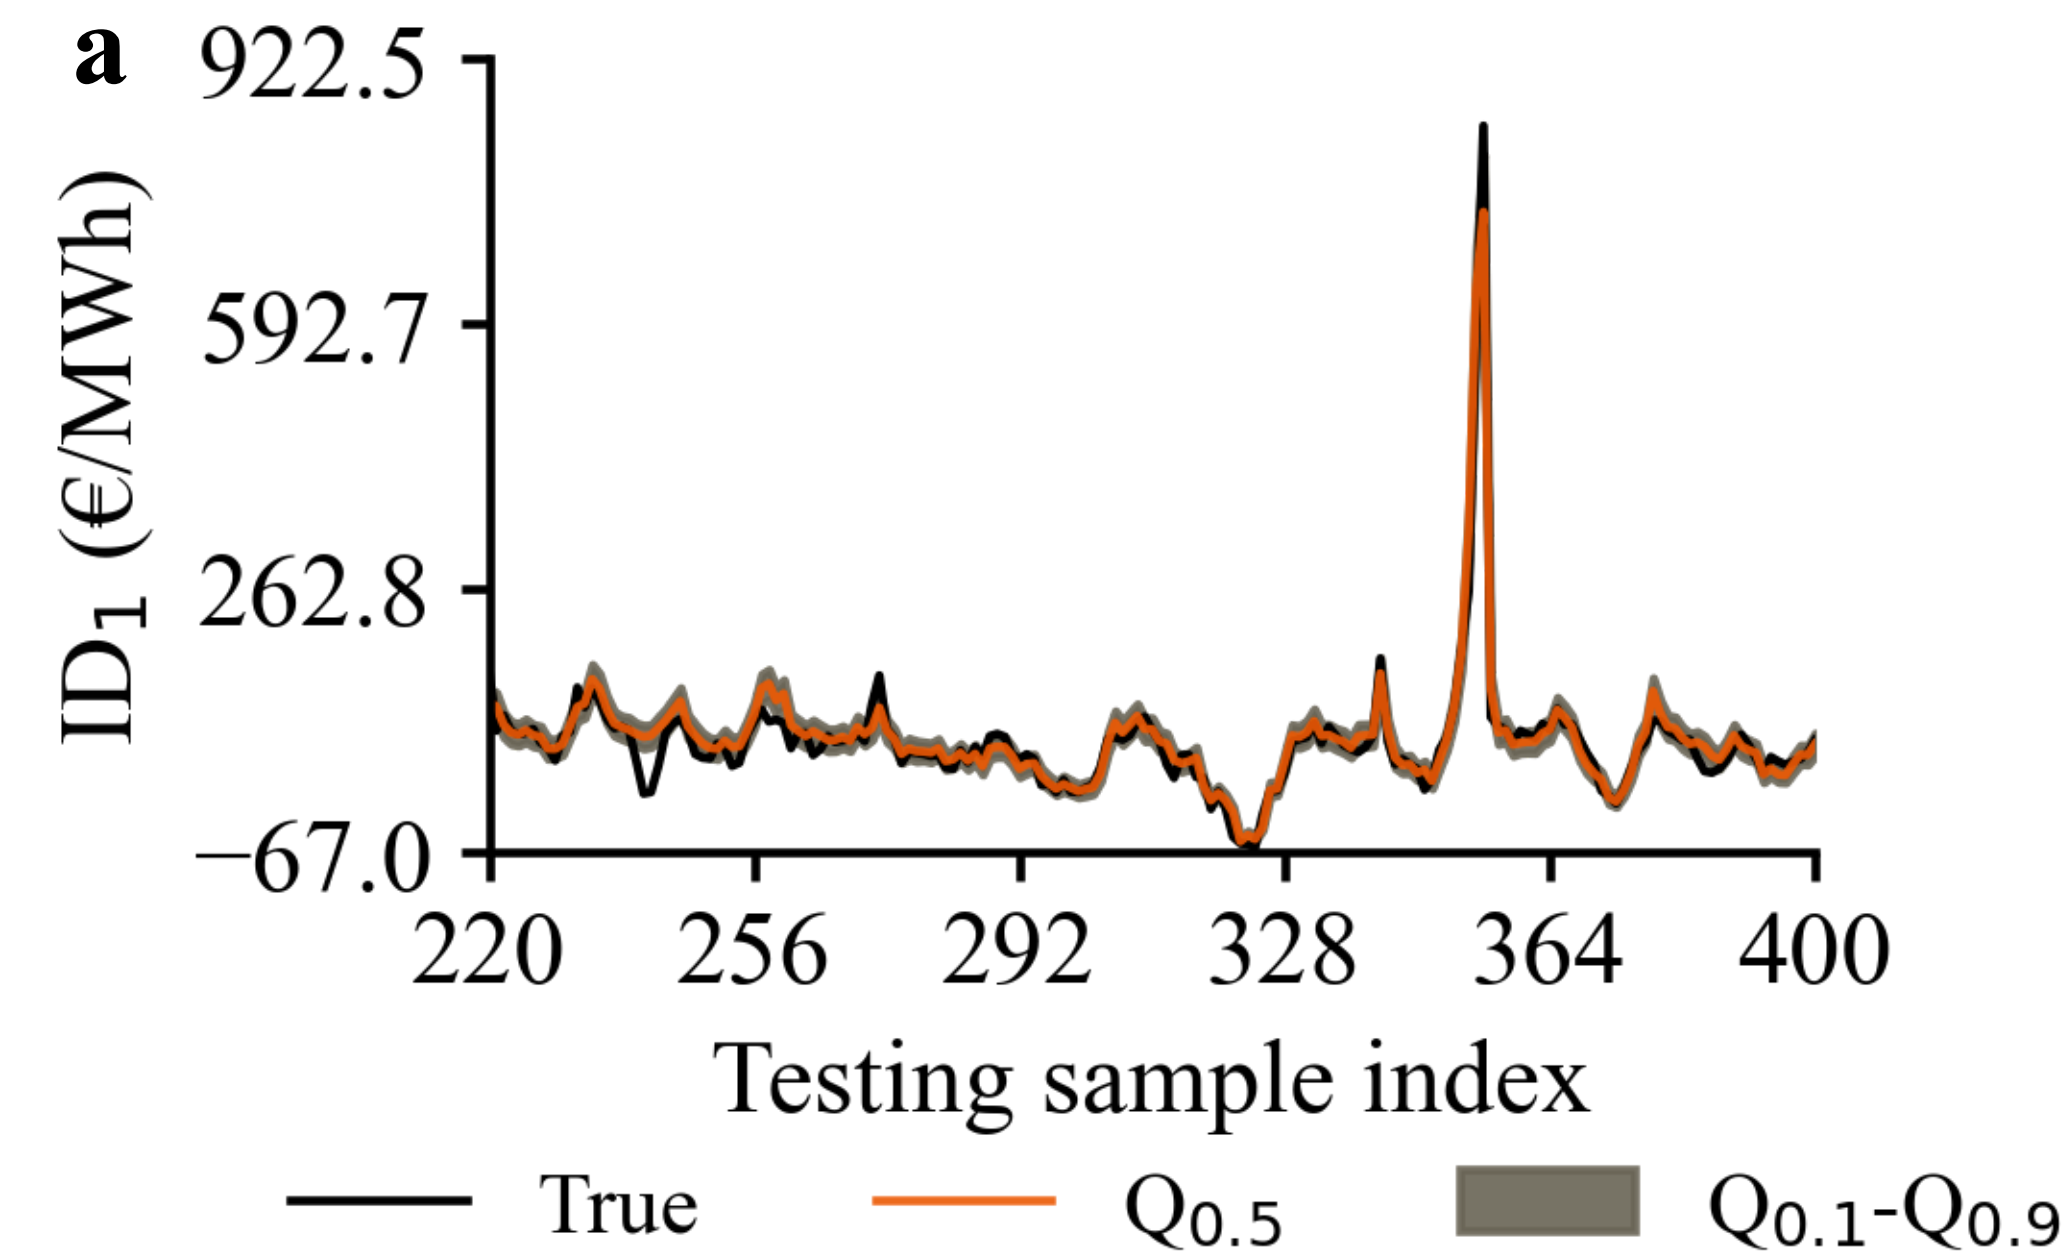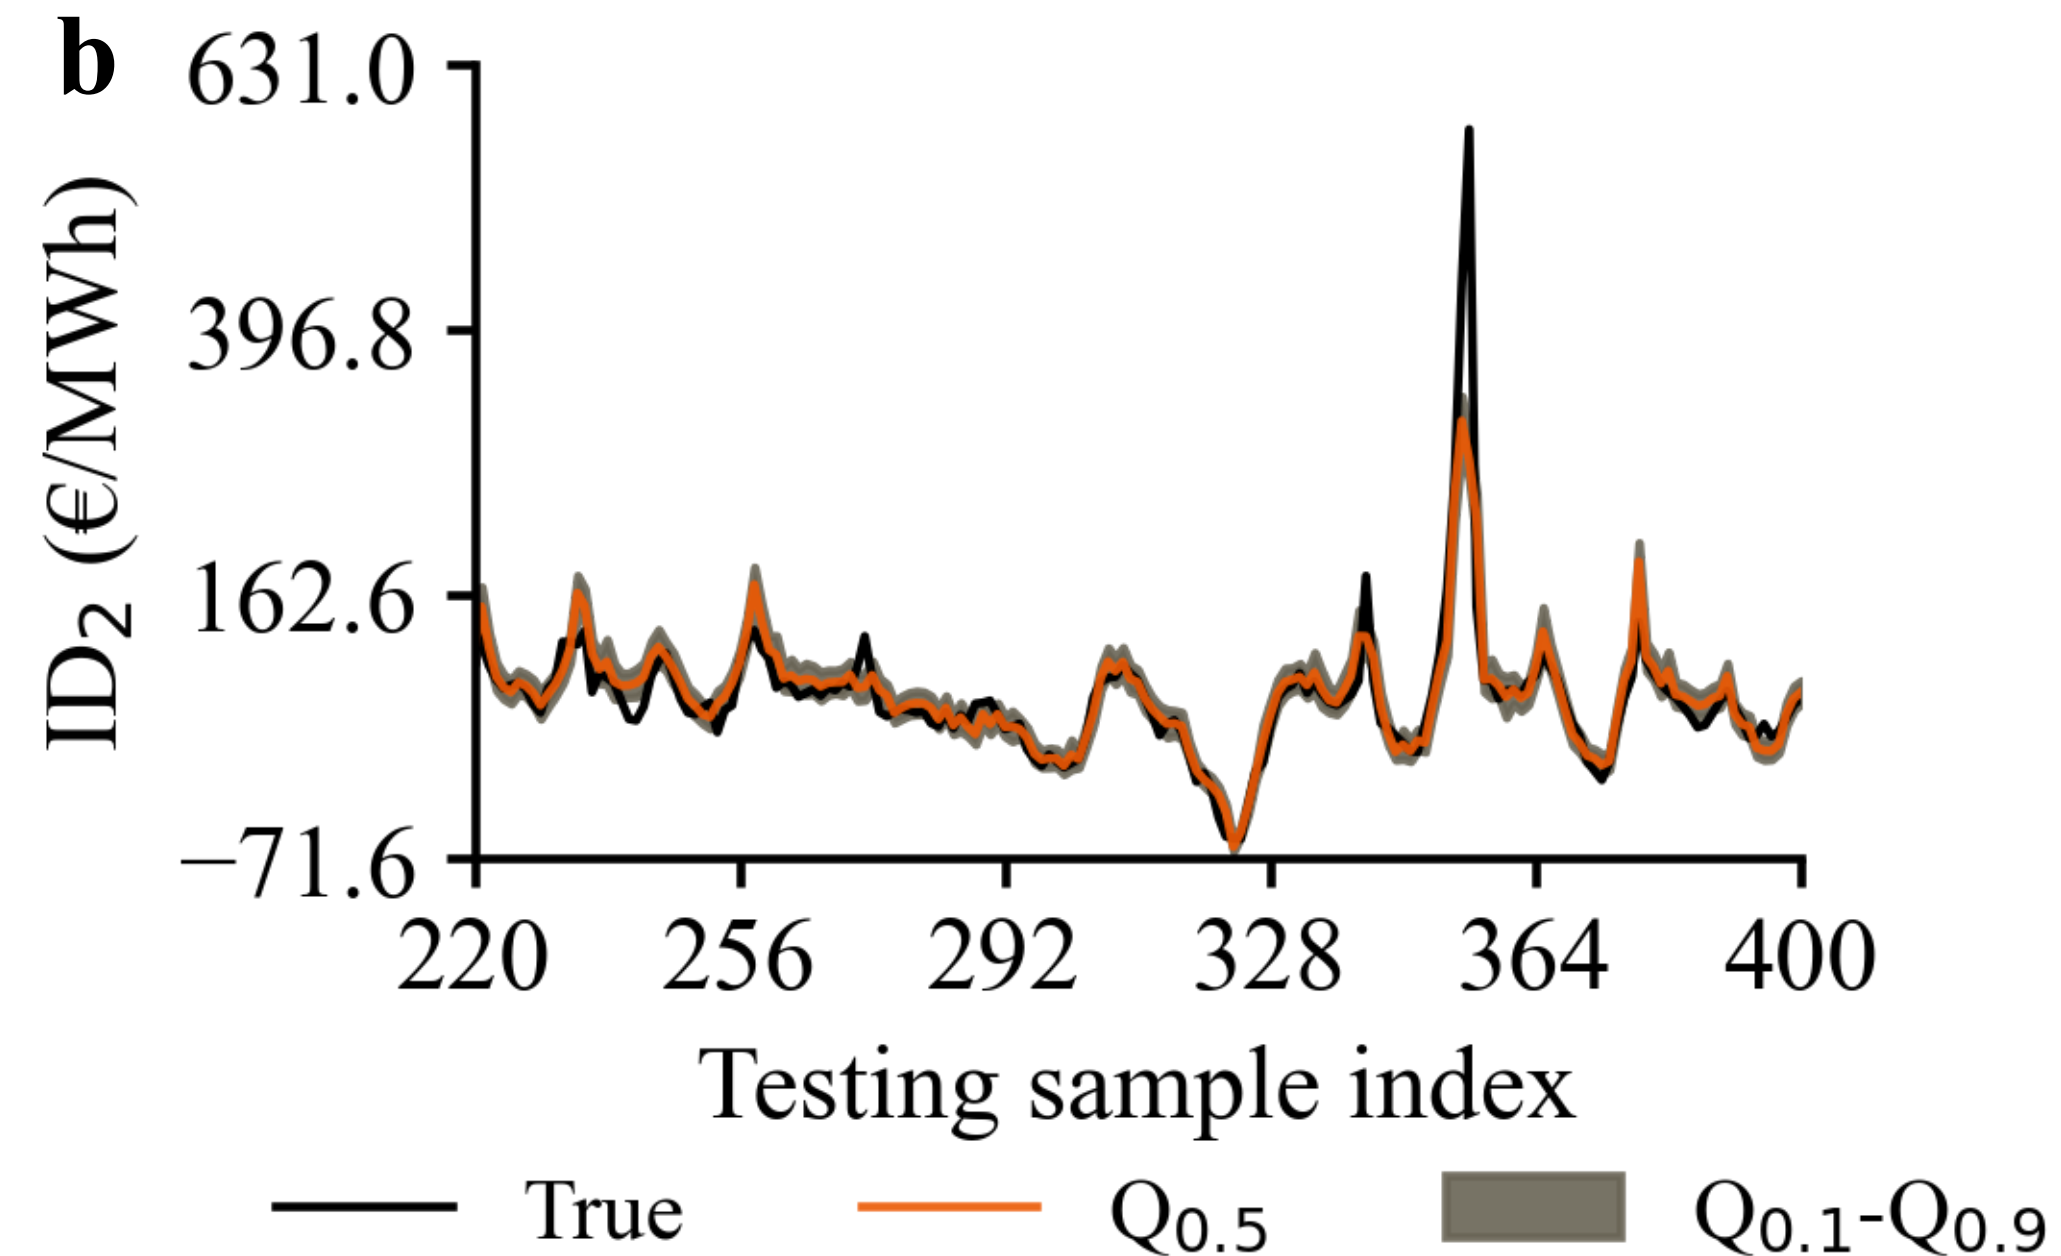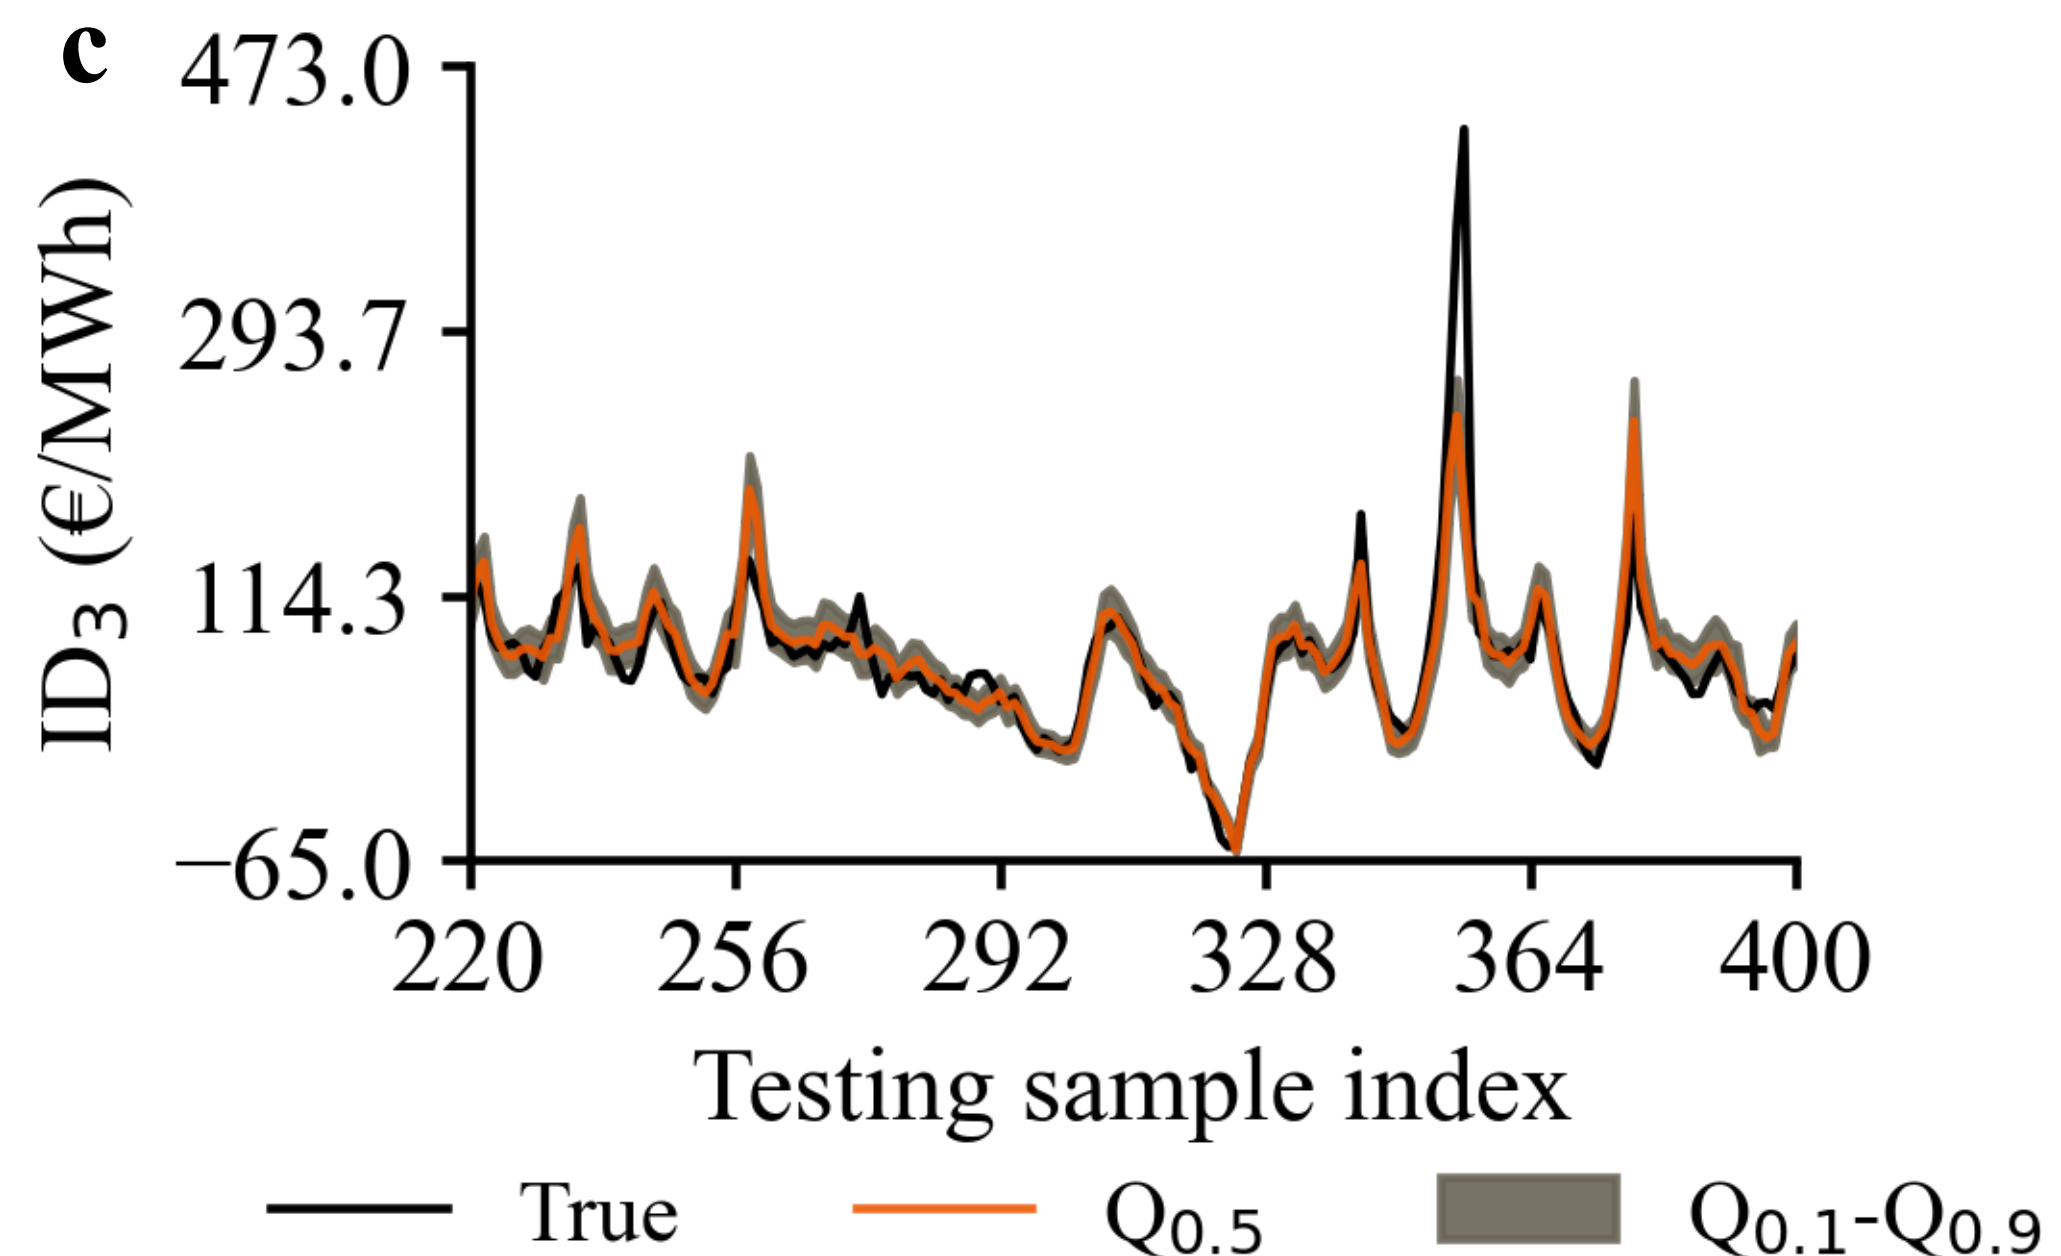

Supplement: supplementary_material [file Extreme_Regime.pdf › ICLR_OrderFusion/Figure/Extreme_Regime.pdf]

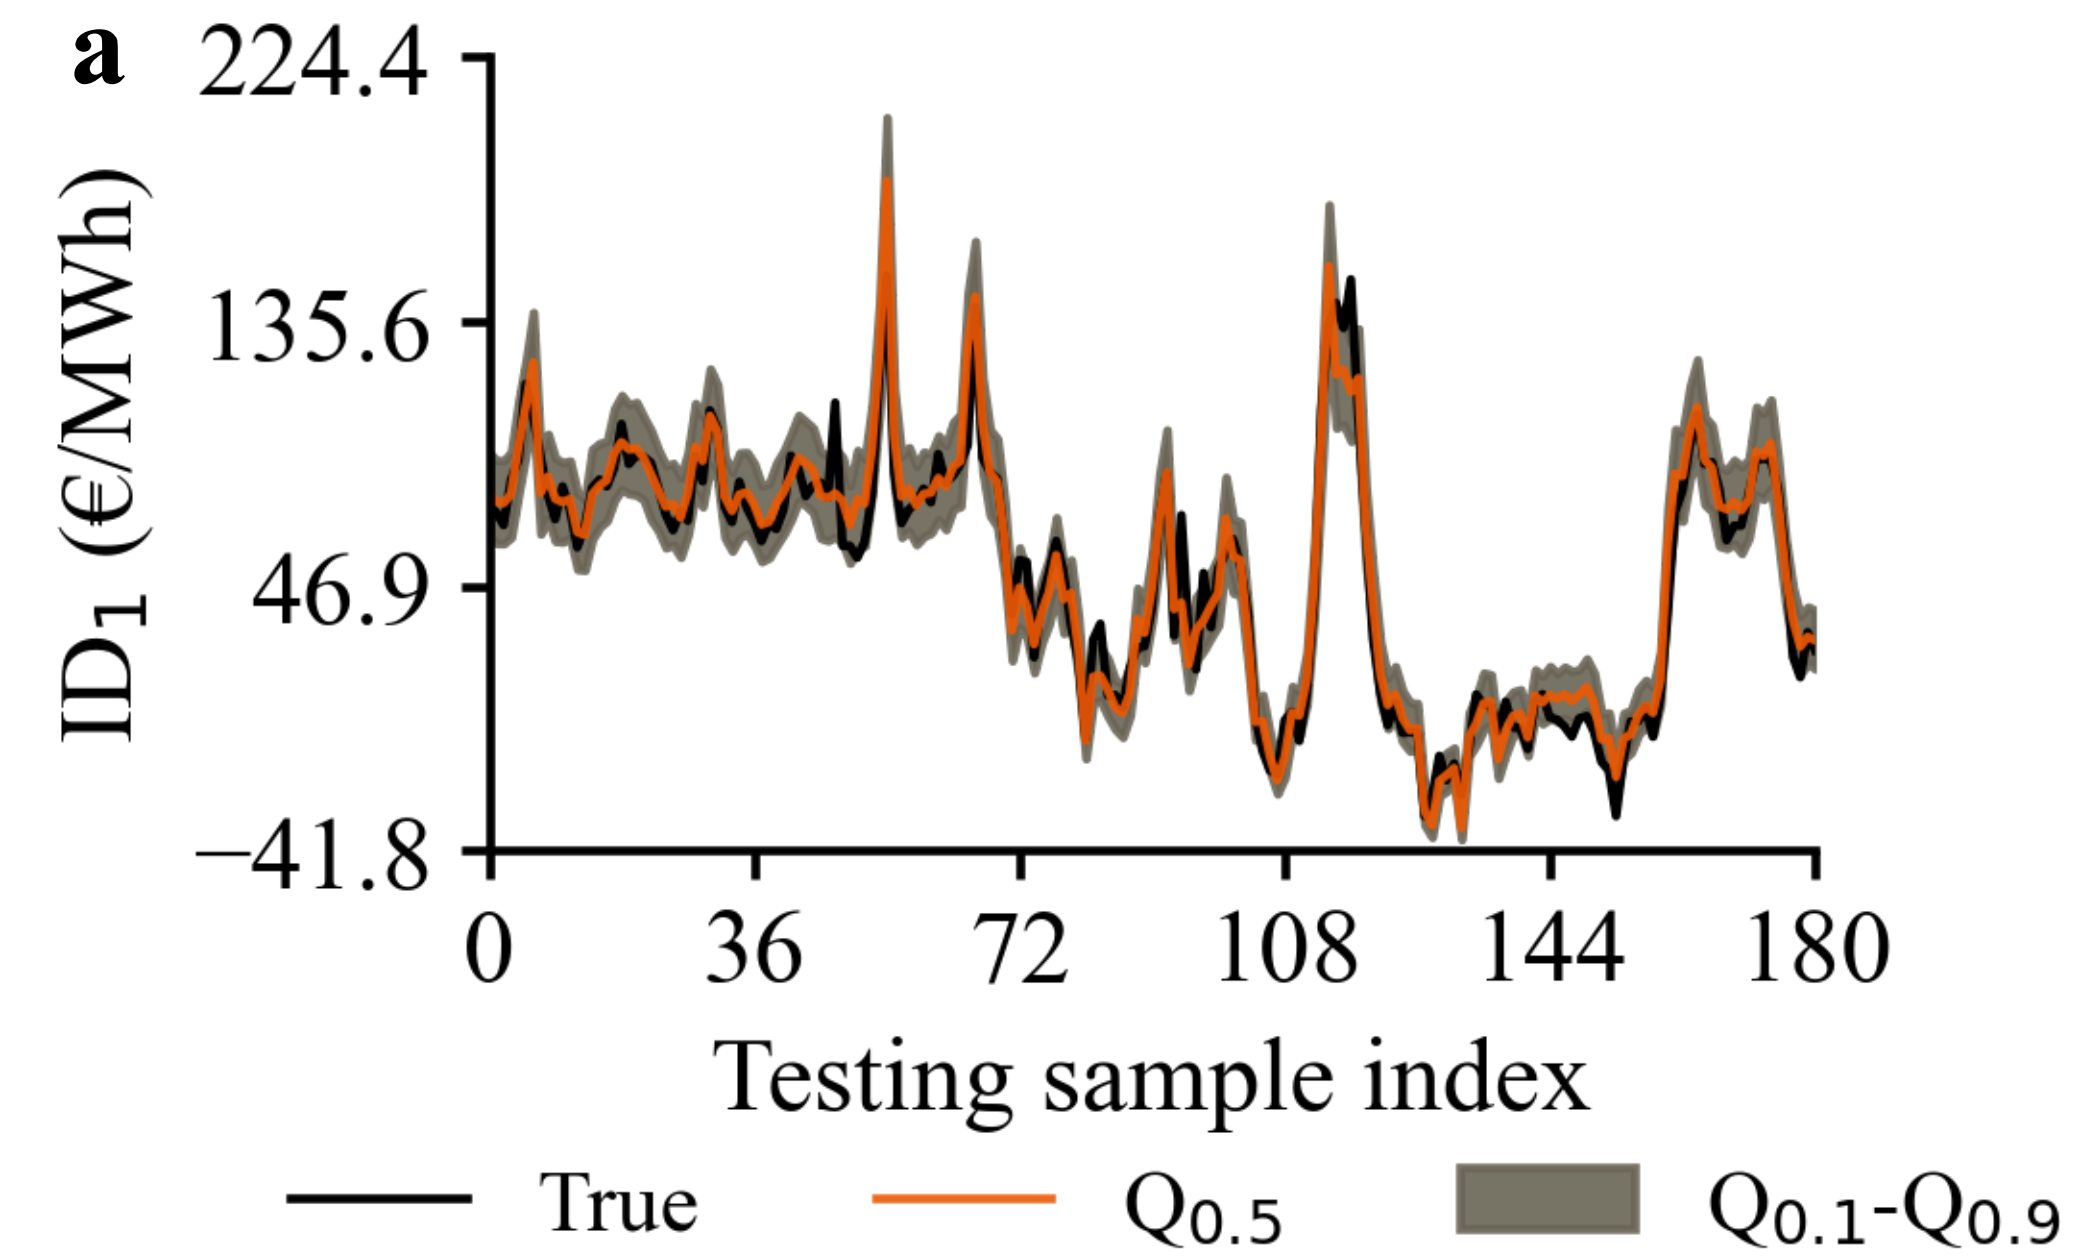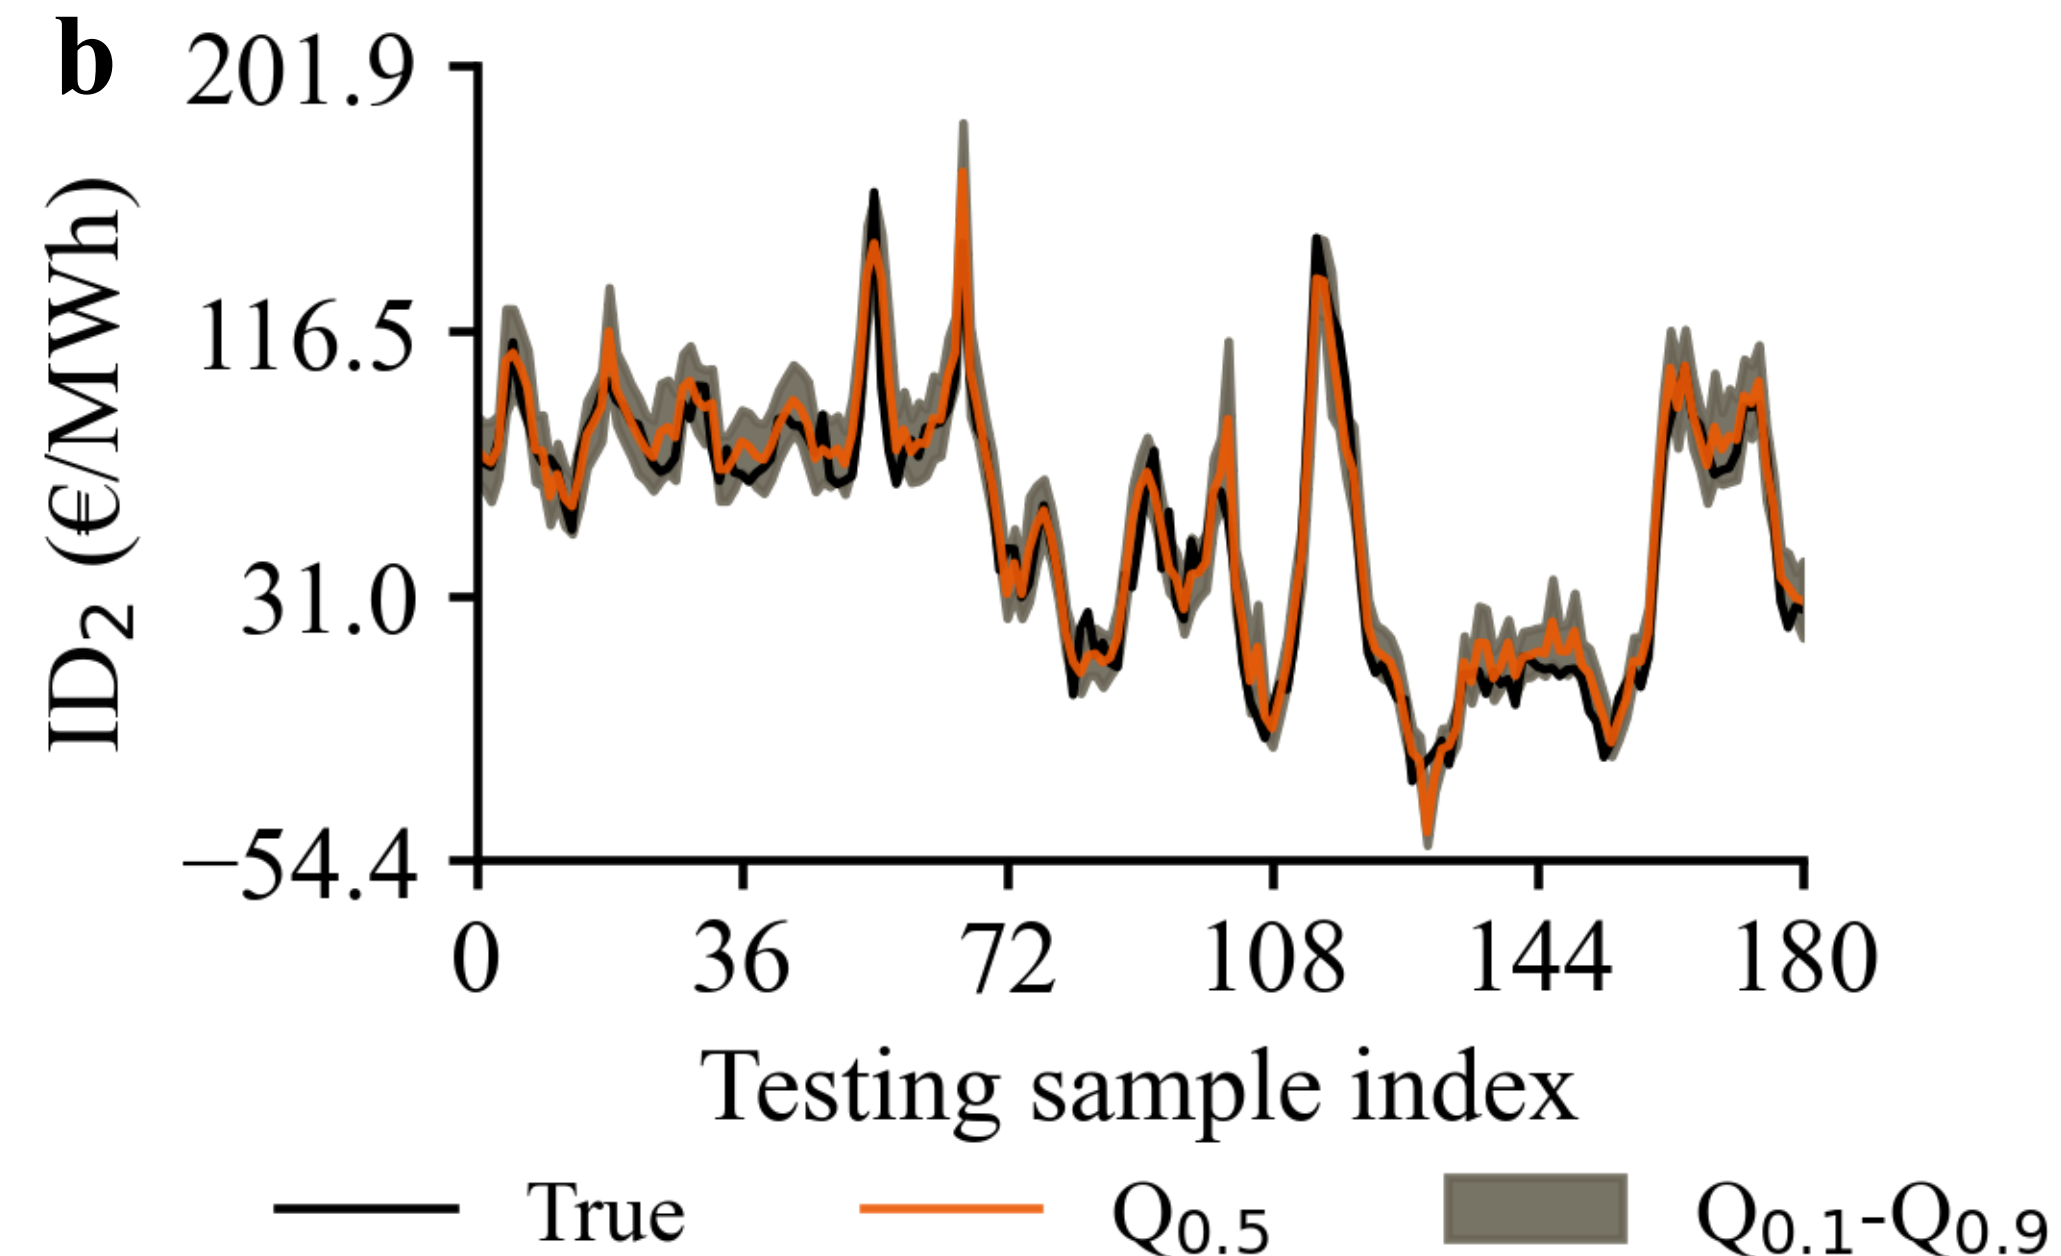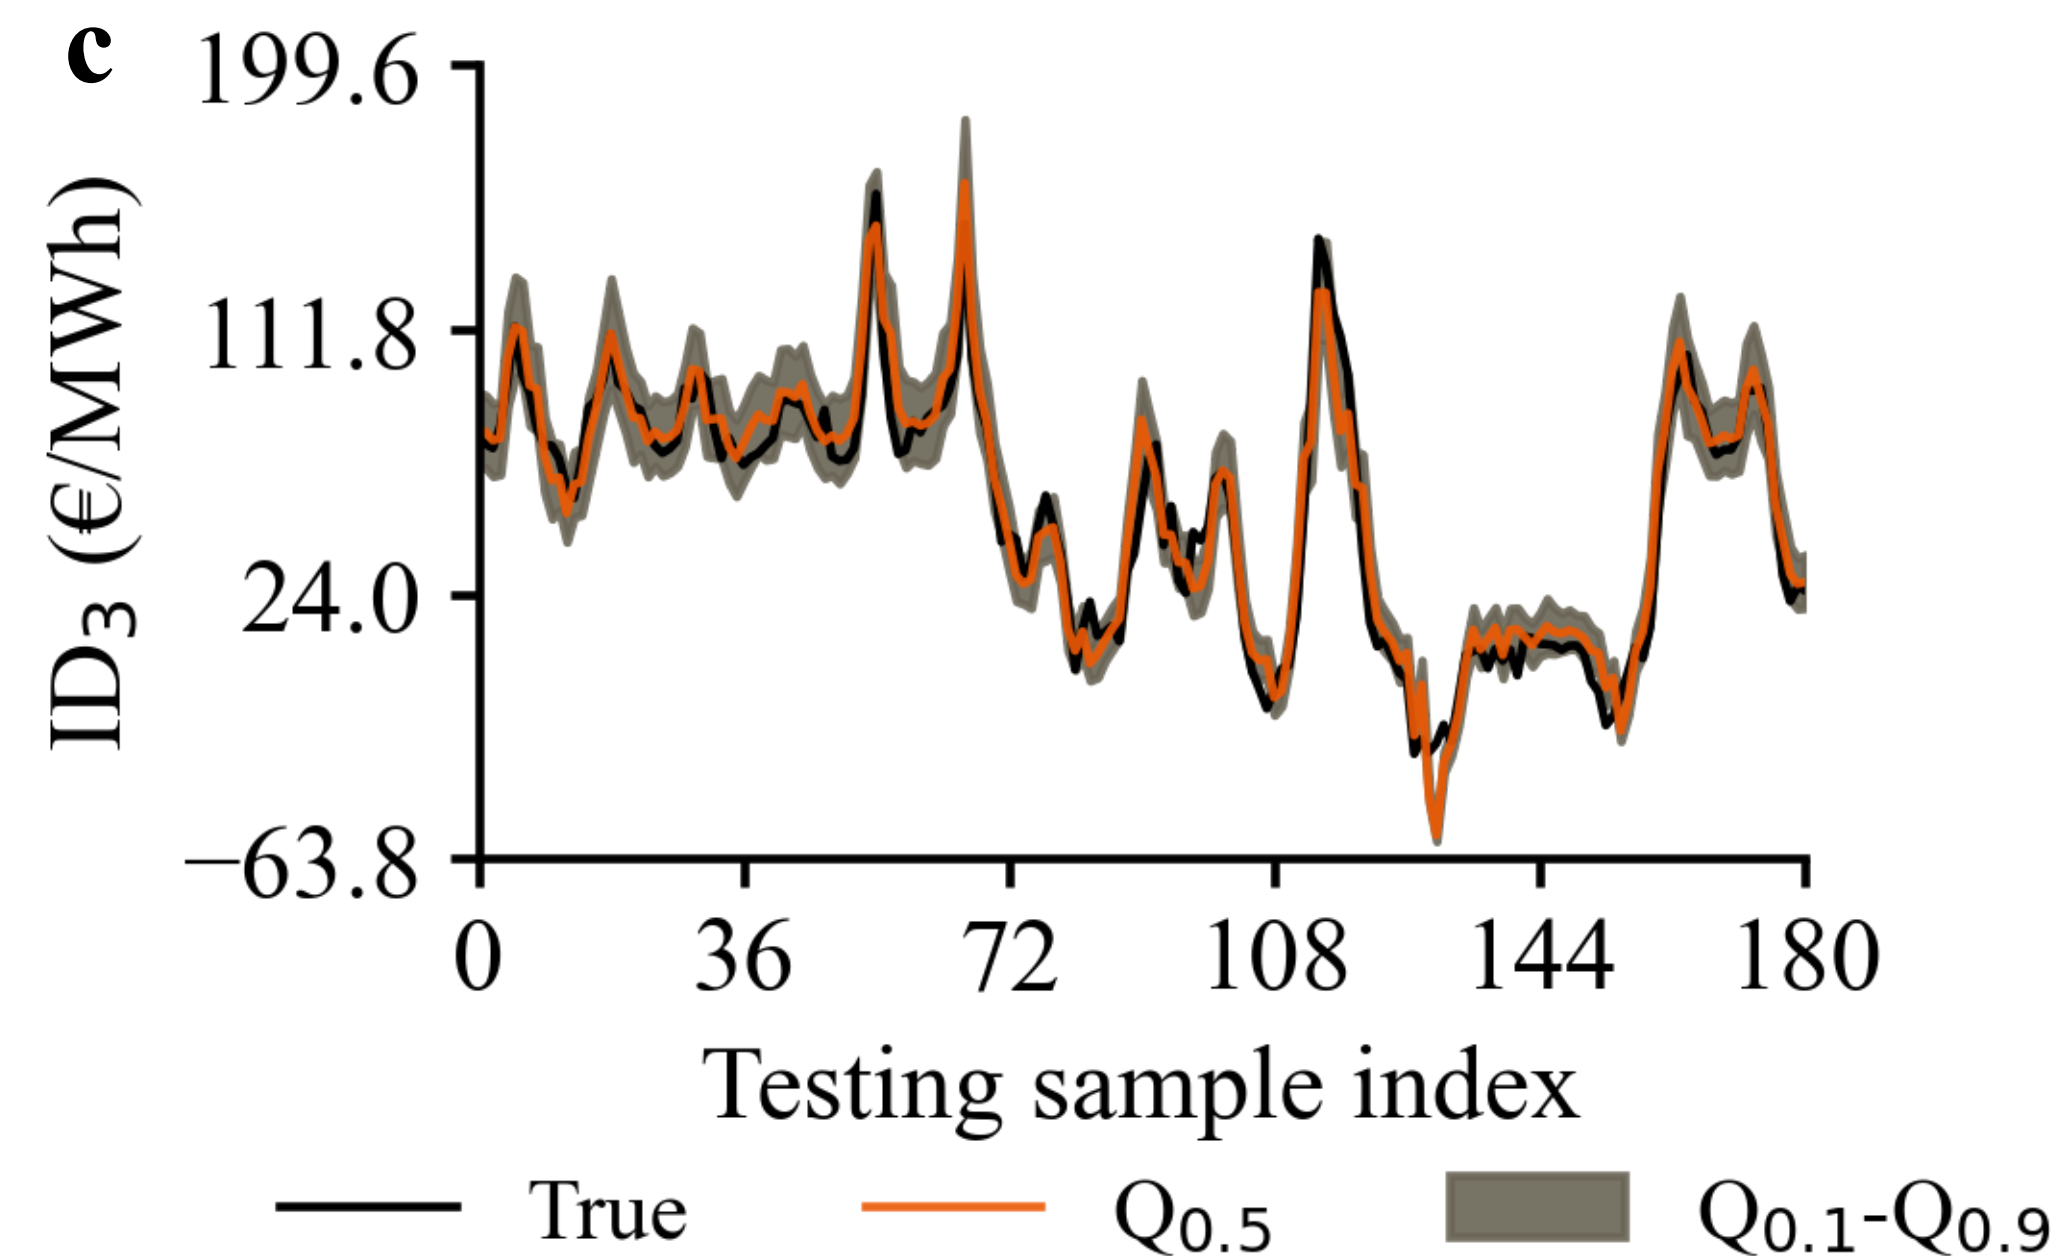

Supplement: supplementary_material [file Normal_Regime.pdf › ICLR_OrderFusion/Figure/Normal_Regime.pdf]

## Backbone

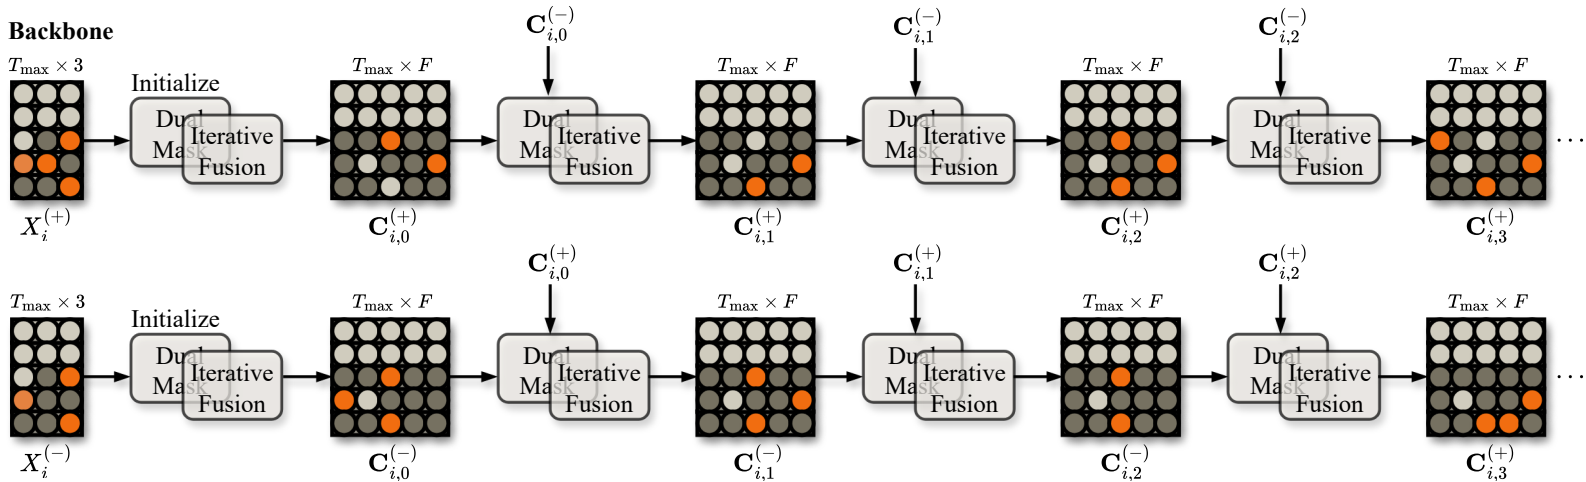

## Dual Masking Layer

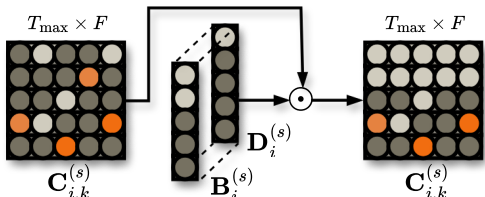

## Head

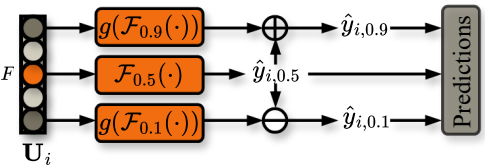

## Iterative Fusion Layer

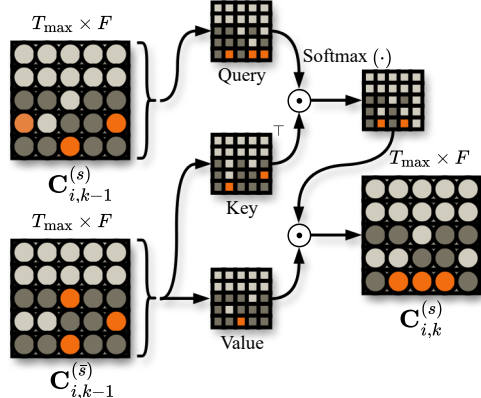

## Aggregation Layer

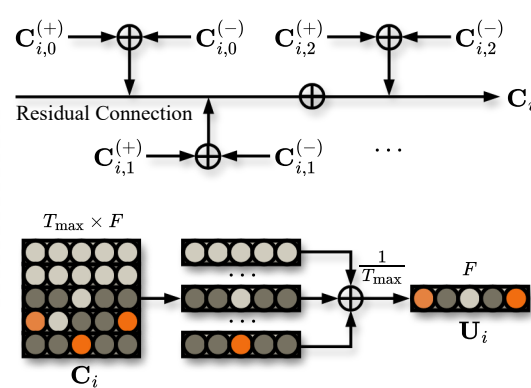

Supplement: supplementary_material [file OrderFusion_Structure.pdf › ICLR_OrderFusion/Figure/OrderFusion_Structure.pdf]
